# Supplementary material
Source: MDPI journal article supplement (https://www.mdpi.com/search?q=molecules-24-01402)
Supplement: s001 [file molecules-24-01402-s001.pdf]

Supplementary Materials

**Distinct Difference in Sensitivity of NIR vs. IR Bands of  
Melamine to Inter-molecular Interactions with Impact on  
Analytical Spectroscopy Explained by Anharmonic  
Quantum Mechanical Study**

**Supplementary Materials**

Justyna Grabska <sup>1</sup>, Krzysztof B. Beć <sup>1,2\*</sup>, Christian G. Kirchler <sup>1</sup>, Yukihiro Ozaki <sup>3</sup>, and Christian W. Huck <sup>1</sup>

<sup>1</sup> Institute of Analytical Chemistry and Radiochemistry, Leopold-Franzens University, Innrain 80/82, CCB-Center for Chemistry and Biomedicine, 6020-Innsbruck, Austria; justyna.grabska7@gmail.com (J.G.); Christian.Kirchler@uibk.ac.at (C.G.K.); Christian.W.Huck@uibk.ac.at (C.W.H.)

<sup>2</sup> Faculty of Chemistry, University of Wrocław, F. Joliot-Curie 14, 50-383 Wrocław, Poland

<sup>3</sup> Department of Chemistry, School of Science and Technology, Kwansai Gakuin University, Sanda, Hyogo 669-1337, Japan; ozaki@kwansai.ac.jp (Y.O.)

\* Correspondence: krzysztof.bec@chem.uni.wroc.pl.

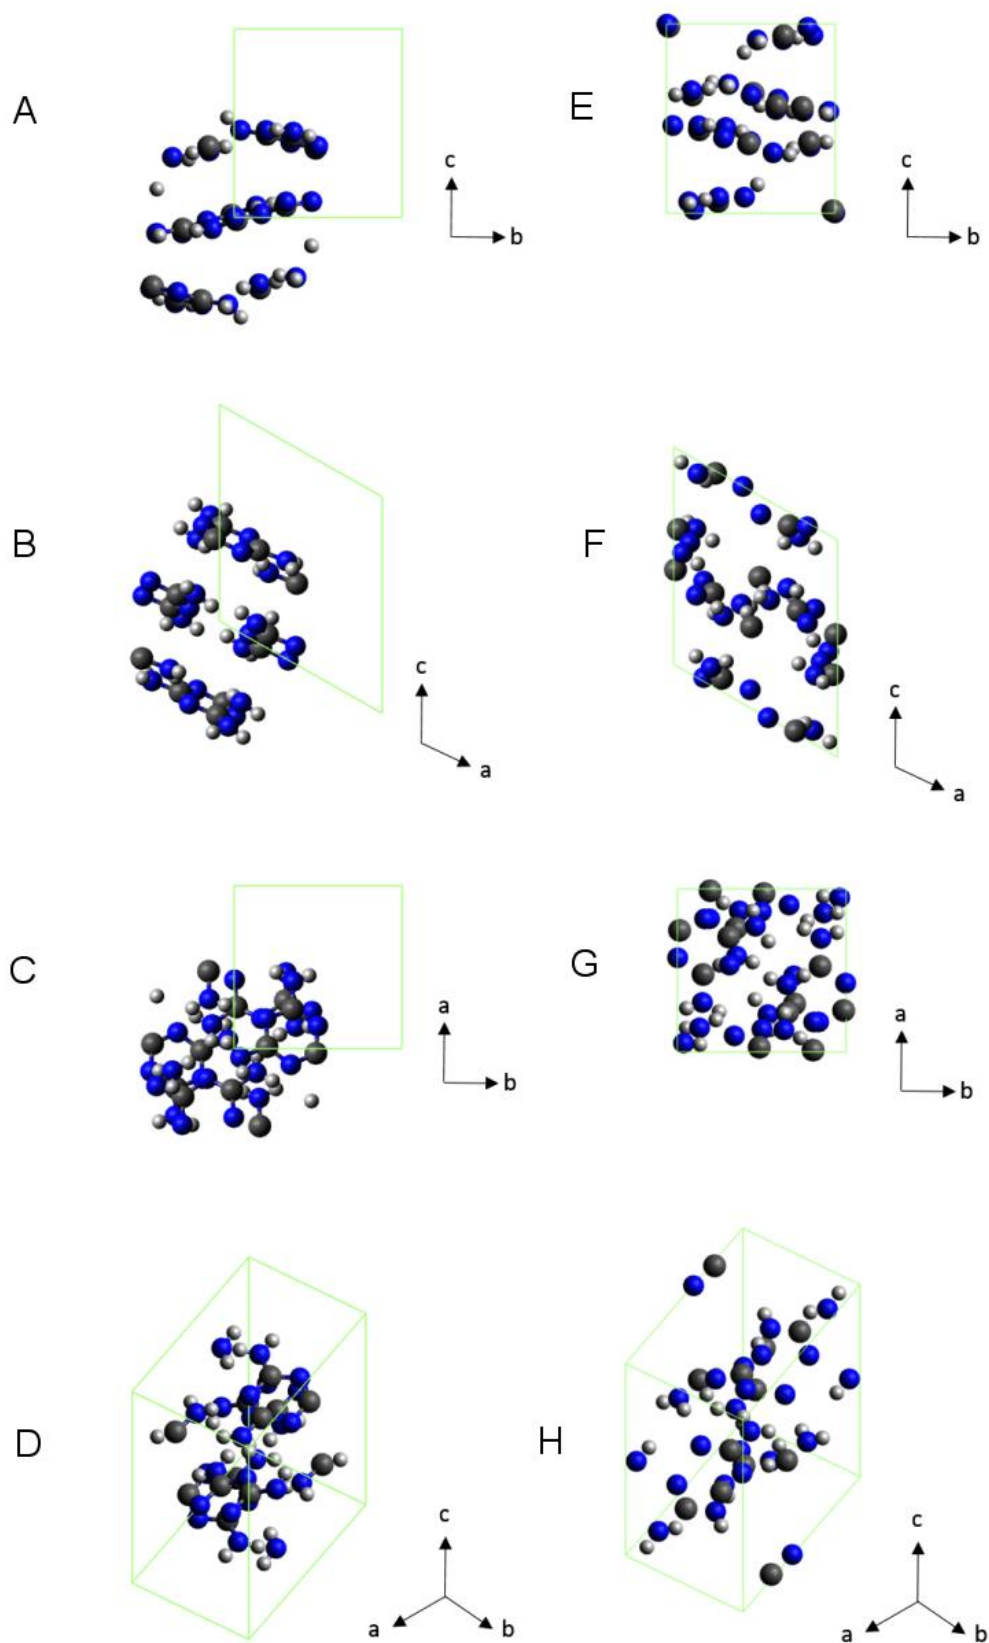

Figure S1. Optimized (B3LYP/Gatti) primitive cell of melamine. CRYSTAL output (A-D), and with atoms wrapped to the cell (E-H).

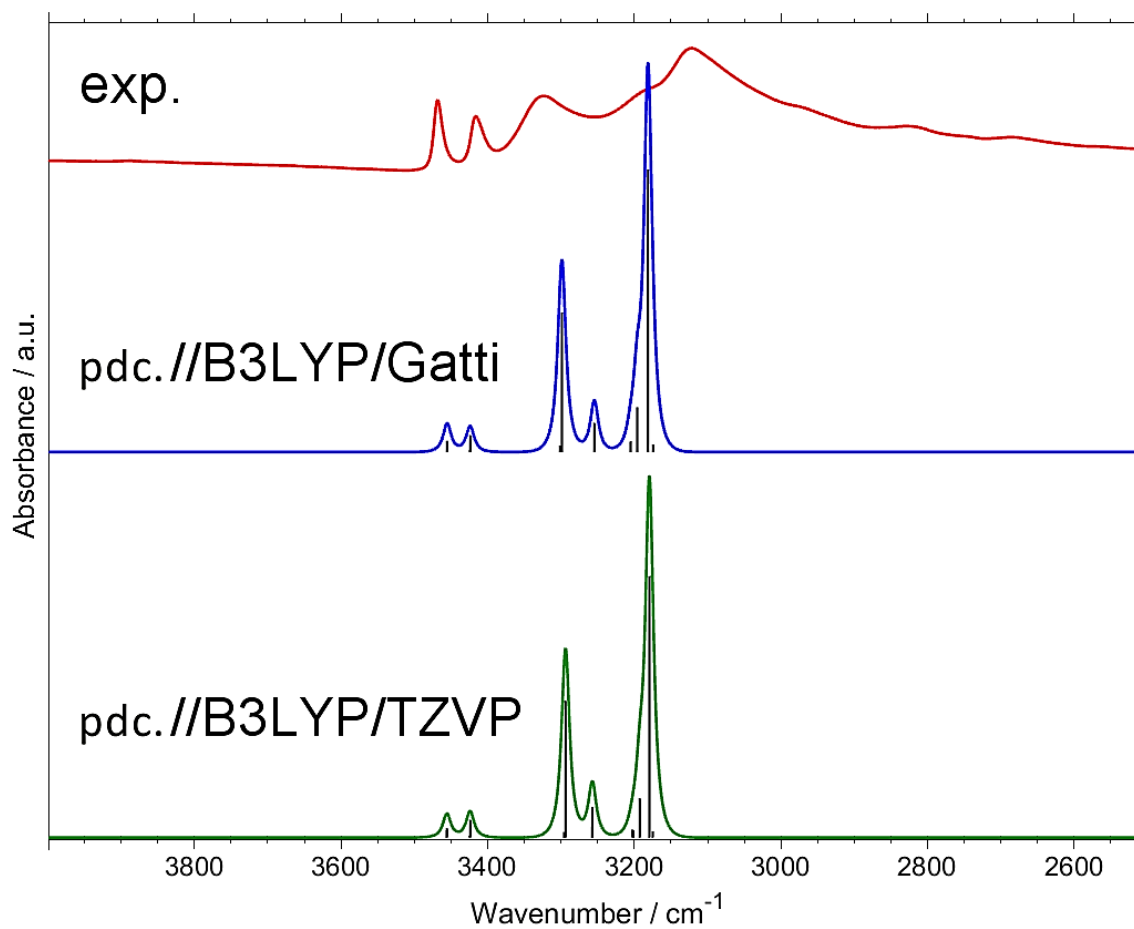

Figure S2. Comparison of the experimental ATR-IR spectrum of polycrystalline melamine (4000-2500  $\text{cm}^{-1}$  region) with the spectra calculated for periodic (3D, infinite) model of crystal lattice in harmonic approximation at B3LYP/Gatti and B3LYP/TZVP levels.

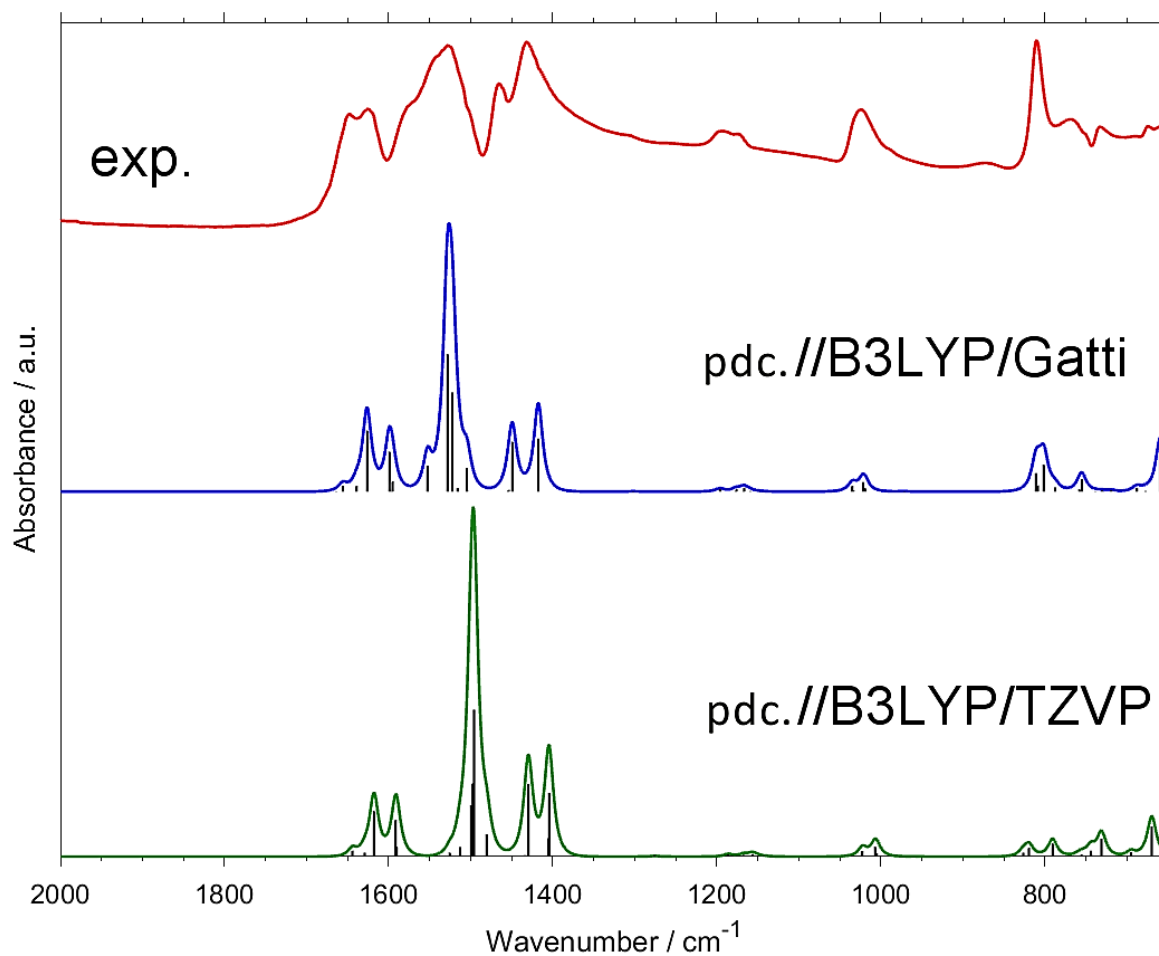

Figure S3. Comparison of the experimental ATR-IR spectrum of polycrystalline melamine (2000-650 cm<sup>-1</sup> region) with the spectra calculated for periodic (3D, infinite) model of crystal lattice in harmonic approximation at B3LYP/Gatti and B3LYP/TZVP levels.

**Table S1. Projection of normal coordinates of melamine onto natural internal coordinates. Based on Potential Energy Distribution (PED) analysis carried out for single molecule model vibrationally analyzed at B3LYP-GD3BJ/SNST level.**

| Calc. Freq. [cm <sup>-1</sup> ] |        | Contributions of Natural Internal Coordinates |                                                                            |            |                                  |            |                                                               |
|---------------------------------|--------|-----------------------------------------------|----------------------------------------------------------------------------|------------|----------------------------------|------------|---------------------------------------------------------------|
| Harm                            | Anharm |                                               |                                                                            |            |                                  |            |                                                               |
| 3728.7                          | 3591.9 | <b>100%</b>                                   | $\nu_{as}$ NH <sub>2</sub> in-phase (C <sub>1</sub> , C <sub>3</sub> )     |            |                                  |            |                                                               |
| 3728.4                          | 3591.5 | <b>100%</b>                                   | $\nu_{as}$ NH <sub>2</sub> out-of-phase (C <sub>1</sub> , C <sub>3</sub> ) |            |                                  |            |                                                               |
| 3725.5                          | 3585.3 | <b>100%</b>                                   | $\nu_{as}$ NH <sub>2</sub> (C <sub>5</sub> )                               |            |                                  |            |                                                               |
| 3595.4                          | 3467.9 | <b>92%</b>                                    | $\nu_s$ NH <sub>2</sub>                                                    |            |                                  |            |                                                               |
| 3594.0                          | 3467.1 | <b>100%</b>                                   | $\nu_s$ NH <sub>2</sub> out of phase (C <sub>1</sub> , C <sub>3</sub> )    |            |                                  |            |                                                               |
| 3592.3                          | 3463.0 | <b>92%</b>                                    | $\nu_s$ NH <sub>2</sub> (C <sub>5</sub> )                                  |            |                                  |            |                                                               |
| 1658.2                          | 1616.0 | <b>45%</b>                                    | $\delta_{sciss}$ NH <sub>2</sub> in phase                                  | <b>39%</b> | $\nu$ C-N(H <sub>2</sub> )       | <b>11%</b> | $\delta_{ip}$ ring                                            |
| 1617.5                          | 1578.3 | <b>50%</b>                                    | $\delta_{sciss}$ NH <sub>2</sub>                                           | <b>18%</b> | $\nu$ C-N(H <sub>2</sub> )       | <b>12%</b> | $\nu$ C-N (ring) <b>5%</b> $\delta_{ip}$ ring                 |
| 1617.4                          | 1577.0 | <b>50%</b>                                    | $\delta_{sciss}$ NH <sub>2</sub>                                           | <b>12%</b> | $\nu$ C-N(H <sub>2</sub> )       | <b>14%</b> | $\nu$ C-N (ring) <b>6%</b> $\delta_{ip}$ ring                 |
| 1596.0                          | 1539.5 | <b>58%</b>                                    | $\nu$ C-N (ring)                                                           | <b>22%</b> | $\delta_{sciss}$ NH <sub>2</sub> | <b>5%</b>  | $\delta_{ip}$ ring                                            |
| 1595.8                          | 1541.4 | <b>60%</b>                                    | $\nu$ C-N (ring)                                                           | <b>14%</b> | $\delta_{sciss}$ NH <sub>2</sub> | <b>6%</b>  | $\delta_{ip}$ ring                                            |
| 1511.0                          | 1473.8 | <b>48%</b>                                    | $\delta_{sciss}$ NH <sub>2</sub>                                           | <b>24%</b> | $\nu$ C-N(H <sub>2</sub> )       | <b>19%</b> | $\delta_{ip}$ ring                                            |
| 1465.2                          | 1432.3 | <b>34%</b>                                    | $\nu$ C-N(H <sub>2</sub> )                                                 | <b>26%</b> | $\nu$ C-N (ring)                 | <b>14%</b> | $\delta_{sciss}$ NH <sub>2</sub> <b>5%</b> $\delta_{ip}$ ring |
| 1464.8                          | 1430.6 | <b>40%</b>                                    | $\nu$ C-N (ring)                                                           | <b>35%</b> | $\nu$ C-N(H <sub>2</sub> )       | <b>9%</b>  | $\delta_{sciss}$ NH <sub>2</sub> <b>6%</b> $\delta_{ip}$ ring |
| 1304.6                          | 1256.0 | <b>84%</b>                                    | $\nu$ C-N (ring)                                                           |            |                                  |            |                                                               |
| 1172.1                          | 1139.8 | <b>38%</b>                                    | $\nu$ C-N(H <sub>2</sub> )                                                 | <b>20%</b> | $\delta_{rock}$ NH <sub>2</sub>  | <b>16%</b> | $\nu$ C-N (ring)                                              |
| 1171.3                          | 1138.2 | <b>38%</b>                                    | $\nu$ C-N(H <sub>2</sub> )                                                 | <b>28%</b> | $\delta_{rock}$ NH <sub>2</sub>  | <b>26%</b> | $\nu$ C-N (ring)                                              |

|        |        |            |                                               |            |                                               |           |                                   |
|--------|--------|------------|-----------------------------------------------|------------|-----------------------------------------------|-----------|-----------------------------------|
| 1147.9 | 1095.9 | <b>59%</b> | $\delta_{\text{rock}} \text{NH}_2$            | <b>37%</b> | vC-N (ring)                                   |           |                                   |
| 1002.1 | 958.3  | <b>48%</b> | $\delta_{\text{rock}} \text{NH}_2$            | <b>34%</b> | vC-N (ring)                                   | <b>6%</b> | $\delta_{\text{ip}} \text{ ring}$ |
| 1000.9 | 954.7  | <b>50%</b> | $\delta_{\text{rock}} \text{NH}_2$            | <b>34%</b> | vC-N (ring)                                   | <b>6%</b> | $\delta_{\text{ip}} \text{ ring}$ |
| 989.5  | 971.3  | <b>47%</b> | $\delta_{\text{ip}} \text{ ring}$             | <b>48%</b> | vC-N (ring)                                   |           |                                   |
| 831.2  | 817.8  | <b>52%</b> | $\delta_{\text{oop}} \text{ ring}$            | <b>47%</b> | $\delta_{\text{oop}} \text{ C-N(H}_2\text{)}$ |           |                                   |
| 748.4  | 742.8  | <b>61%</b> | $\delta_{\text{oop}} \text{ C-N(H}_2\text{)}$ | <b>34%</b> | $\delta_{\text{oop}} \text{ ring}$            |           |                                   |
| 747.7  | 741.8  | <b>65%</b> | $\delta_{\text{oop}} \text{ C-N(H}_2\text{)}$ | <b>34%</b> | $\delta_{\text{oop}} \text{ ring}$            |           |                                   |
| 686.7  | 683.3  | <b>45%</b> | vC-N(H <sub>2</sub> )                         | <b>26%</b> | $\delta_{\text{ip}} \text{ ring}$             |           |                                   |
| 588.6  | 583.0  | <b>78%</b> | $\delta_{\text{ip}} \text{ ring}$             | <b>6%</b>  | $\delta_{\text{ip}} \text{ C-N(H}_2\text{)}$  | <b>5%</b> | vC-N(H <sub>2</sub> )             |
| 588.4  | 578.9  | <b>77%</b> | $\delta_{\text{ip}} \text{ ring}$             |            |                                               |           |                                   |
| 558.3  | 516.3  | <b>48%</b> | $\delta_{\text{twist}} \text{NH}_2$           | <b>27%</b> | $\delta_{\text{ip}} \text{ C-N(H}_2\text{)}$  |           |                                   |
| 533.7  | 541.7  | <b>92%</b> | $\delta_{\text{twist}} \text{NH}_2$           |            |                                               |           |                                   |
| 530.1  | 507.5  | <b>97%</b> | $\delta_{\text{twist}} \text{NH}_2$           |            |                                               |           |                                   |
| 508.7  | 576.6  | <b>64%</b> | $\delta_{\text{twist}} \text{NH}_2$           | <b>18%</b> | $\delta_{\text{rock}} \text{NH}_2$            |           |                                   |
| 337.9  | 328.4  | <b>82%</b> | $\delta_{\text{ip}} \text{ C-N(H}_2\text{)}$  |            |                                               |           |                                   |
| 337.8  | 331.8  | <b>83%</b> | $\delta_{\text{ip}} \text{ C-N(H}_2\text{)}$  | <b>5%</b>  | $\delta_{\text{rock}} \text{NH}_2$            |           |                                   |
| 293.1  | 289.9  | <b>77%</b> | $\delta_{\text{wagg}} \text{NH}_2$            | <b>13%</b> | vC-N(H <sub>2</sub> )                         |           |                                   |
| 275.3  | 274.2  | <b>76%</b> | $\delta_{\text{wagg}} \text{NH}_2$            | <b>12%</b> | vC-N(H <sub>2</sub> )                         |           |                                   |
| 252.3  | 248.5  | <b>76%</b> | $\delta_{\text{wagg}} \text{NH}_2$            | <b>14%</b> | vC-N(H <sub>2</sub> )                         |           |                                   |
| 205.5  | 204.2  | <b>66%</b> | $\delta_{\text{oop}} \text{ C-N(H}_2\text{)}$ | <b>34%</b> | $\delta_{\text{oop}} \text{ ring}$            |           |                                   |
| 184.3  | 175.9  | <b>51%</b> | $\delta_{\text{oop}} \text{ ring}$            | <b>46%</b> | $\delta_{\text{oop}} \text{ C-N(H}_2\text{)}$ |           |                                   |
| 183.6  | 164.7  | <b>53%</b> | $\delta_{\text{oop}} \text{ C-N(H}_2\text{)}$ | <b>43%</b> | $\delta_{\text{oop}} \text{ ring}$            |           |                                   |

**Funding:**

This work was supported by the Austrian Science Fund (FWF), P32004-N28.

This work was supported by the National Science Center Poland (NCN), Grant 2017/27/B/ST4/00948.

**Acknowledgements:**

Calculations have been carried out in Wrocław Centre for Networking and Supercomputing (<http://www.wcss.pl>), under grant no. 375.

**Conflicts of Interest:** The authors declare no conflict of interest. The funders had no role in the design of the study; in the collection, analyses, or interpretation of data; in the writing of the manuscript, or in the decision to publish the results.
